# Supplementary material
Source: Research Square preprint supplement (doi:10.21203/rs.3.rs-9004337/v1)
Supplement: Supplementary file 1 [file ee5dba7c4d743b9995309ee2.pdf]

Supplementary table 1. P-values corresponding to testing the null-hypothesis that the number of SNPs is equal among each exon/intron of a gene tested with the Friedman test.

| no exons | exons human            | exons cattle           | exons pig              | introns human          | introns cattle         | introns pig           |
|----------|------------------------|------------------------|------------------------|------------------------|------------------------|-----------------------|
| 3        | 0                      | $6.88 \cdot 10^{-184}$ | $1.97 \cdot 10^{-261}$ | -                      | -                      | -                     |
| 4        | 0                      | $6.45 \cdot 10^{-296}$ | 0                      | $2.38 \cdot 10^{-128}$ | $6.43 \cdot 10^{-135}$ | $2.17 \cdot 10^{-5}$  |
| 5        | 0                      | 0                      | 0                      | $3.55 \cdot 10^{-115}$ | $5.56 \cdot 10^{-128}$ | $1.97 \cdot 10^{-16}$ |
| 6        | 0                      | 0                      | 0                      | $2.35 \cdot 10^{-130}$ | $4.25 \cdot 10^{-122}$ | $8.25 \cdot 10^{-20}$ |
| 7        | 0                      | 0                      | 0                      | $2.66 \cdot 10^{-120}$ | $2.13 \cdot 10^{-122}$ | $5.03 \cdot 10^{-46}$ |
| 8        | 0                      | 0                      | 0                      | $1.37 \cdot 10^{-132}$ | $2.28 \cdot 10^{-124}$ | $1.63 \cdot 10^{-42}$ |
| 9        | 0                      | 0                      | 0                      | $4.58 \cdot 10^{-153}$ | $2.45 \cdot 10^{-127}$ | $3.52 \cdot 10^{-42}$ |
| 10       | 0                      | 0                      | 0                      | $3.10 \cdot 10^{-146}$ | $9.68 \cdot 10^{-118}$ | $1.79 \cdot 10^{-50}$ |
| 11       | 0                      | $5.88 \cdot 10^{287}$  | 0                      | $2.57 \cdot 10^{-139}$ | $1.38 \cdot 10^{-115}$ | $3.84 \cdot 10^{-34}$ |
| 12       | 0                      | 0                      | 0                      | $2.30 \cdot 10^{-156}$ | $1.30 \cdot 10^{-130}$ | $5.22 \cdot 10^{-47}$ |
| 13       | 0                      | $2.20 \cdot 10^{-247}$ | 0                      | $6.94 \cdot 10^{-135}$ | $6.15 \cdot 10^{-110}$ | $1.03 \cdot 10^{-48}$ |
| 14       | 0                      | $2.47 \cdot 10^{-244}$ | 0                      | $4.69 \cdot 10^{-126}$ | $5.91 \cdot 10^{-98}$  | $1.61 \cdot 10^{-54}$ |
| 15       | 0                      | $2.59 \cdot 10^{-182}$ | 0                      | $1.49 \cdot 10^{-102}$ | $1.90 \cdot 10^{-76}$  | $1.56 \cdot 10^{-47}$ |
| 16       | 0                      | $4.53 \cdot 10^{-187}$ | 0                      | $2.01 \cdot 10^{-106}$ | $8.70 \cdot 10^{-95}$  | $3.82 \cdot 10^{-58}$ |
| 17       | $2.78 \cdot 10^{-320}$ | $1.26 \cdot 10^{-136}$ | 0                      | $6.59 \cdot 10^{-94}$  | $5.74 \cdot 10^{-77}$  | $1.33 \cdot 10^{-36}$ |
| 18       | 0                      | $2.80 \cdot 10^{-147}$ | 0                      | $4.53 \cdot 10^{-83}$  | $2.85 \cdot 10^{-66}$  | $1.50 \cdot 10^{-46}$ |
| 19       | $1.03 \cdot 10^{-272}$ | $1.56 \cdot 10^{-123}$ | $2.67 \cdot 10^{-302}$ | $1.05 \cdot 10^{-62}$  | $4.34 \cdot 10^{-76}$  | $1.61 \cdot 10^{-20}$ |
| 20       | $4.12 \cdot 10^{-271}$ | $9.16 \cdot 10^{-114}$ | $1.57 \cdot 10^{-298}$ | $6.80 \cdot 10^{-76}$  | $4.94 \cdot 10^{-53}$  | $8.32 \cdot 10^{-37}$ |
| 21       | $1.69 \cdot 10^{-239}$ | $8.38 \cdot 10^{-90}$  | $2.01 \cdot 10^{-242}$ | $5.11 \cdot 10^{-88}$  | $4.85 \cdot 10^{-58}$  | $2.06 \cdot 10^{-22}$ |
| 22       | $9.07 \cdot 10^{-204}$ | $6.10 \cdot 10^{-99}$  | $3.10 \cdot 10^{-262}$ | $3.35 \cdot 10^{-60}$  | $1.91 \cdot 10^{-49}$  | $1.37 \cdot 10^{-29}$ |
| 23       | $3.00 \cdot 10^{-206}$ | $1.63 \cdot 10^{-100}$ | $8.02 \cdot 10^{-207}$ | $2.37 \cdot 10^{-100}$ | $8.17 \cdot 10^{-59}$  | $6.51 \cdot 10^{-35}$ |
| 24       | $1.89 \cdot 10^{-157}$ | $5.41 \cdot 10^{-58}$  | $1.69 \cdot 10^{-194}$ | $7.40 \cdot 10^{-54}$  | $3.26 \cdot 10^{-55}$  | $2.32 \cdot 10^{-38}$ |
| 25       | $2.17 \cdot 10^{-134}$ | $5.78 \cdot 10^{-42}$  | $5.77 \cdot 10^{-168}$ | $4.50 \cdot 10^{-43}$  | $5.02 \cdot 10^{-39}$  | $2.33 \cdot 10^{-15}$ |
| 26       | $1.06 \cdot 10^{-123}$ | $1.92 \cdot 10^{-65}$  | $1.43 \cdot 10^{-145}$ | $2.82 \cdot 10^{-35}$  | $2.75 \cdot 10^{-30}$  | $1.23 \cdot 10^{-21}$ |
| 27       | $2.41 \cdot 10^{-105}$ | $1.21 \cdot 10^{-48}$  | $1.95 \cdot 10^{-172}$ | $4.43 \cdot 10^{-35}$  | $8.66 \cdot 10^{-39}$  | $7.64 \cdot 10^{-22}$ |
| 28       | $2.99 \cdot 10^{-122}$ | $2.64 \cdot 10^{-54}$  | $1.31 \cdot 10^{-106}$ | $3.95 \cdot 10^{-43}$  | $6.23 \cdot 10^{-26}$  | $8.70 \cdot 10^{-13}$ |
| 29       | $5.96 \cdot 10^{-65}$  | $2.57 \cdot 10^{-26}$  | $5.14 \cdot 10^{-102}$ | $8.47 \cdot 10^{-19}$  | $1.05 \cdot 10^{-25}$  | $3.52 \cdot 10^{-20}$ |
| 30       | $1.08 \cdot 10^{-84}$  | $1.09 \cdot 10^{-38}$  | $1.90 \cdot 10^{-89}$  | $5.68 \cdot 10^{-38}$  | $3.87 \cdot 10^{-29}$  | $9.75 \cdot 10^{-09}$ |

Table S1: P-values corresponding to testing the null-hypothesis that the number of SNPs is equal among each exon/intron of a gene tested with the Friedman test
